# Supplementary material
Source: PubMed Central journal article supplement (PMC6125521)
Supplement: zac009187452s1.pdf [file zac009187452s1.pdf]

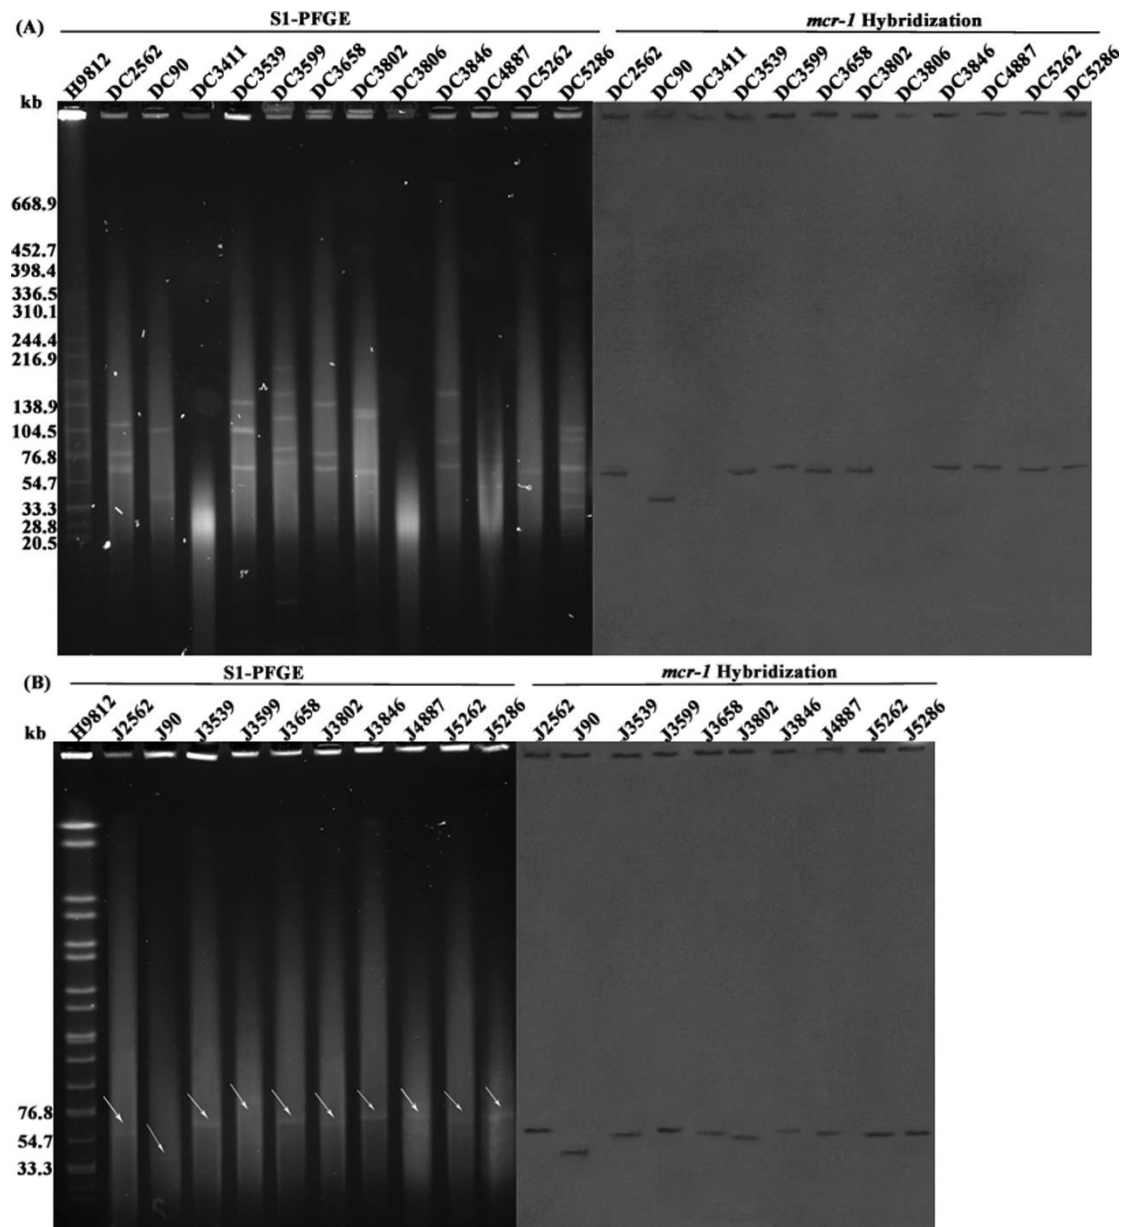

1

2 **Figure S1 S1-PFGE and Southern hybridization of 12 *mcr-I*-positive *E. coli* clinical isolates**  
 3 **and their corresponding transconjugants carrying *mcr-I*.**

4 (A) S1-PFGE and Southern hybridization of 12 *mcr-I*-positive *E. coli* isolates. (B) S1-PFGE and  
 5 Southern hybridization of transconjugants carrying *mcr-I*. Bands in B with arrows pointing to them  
 6 showed positive signals in Southern blotting with the *mcr-I* probe. J2562, J90, J3539, J3599, J3658,  
 7 J3802, J3846, J4887, J5262 and J5286 represent the *mcr-I*-positive transconjugants strains.
